# Supplementary material for: Cycle formation from acetylene addition on C4H3 radicals
Source: Royal Society of Chemistry journal article supplement (doi:10.1039/b921563h), 2010-01-01
Supplement: b921563h.pdf [file b921563h.pdf]

|                                                                                          |           |
|------------------------------------------------------------------------------------------|-----------|
| <b>SUPPORTING INFORMATION</b>                                                            | <b>3</b>  |
| <b>n-C<sub>4</sub>H<sub>3</sub>+C<sub>2</sub>H<sub>2</sub> : Minima</b>                  | <b>3</b>  |
| <i>n</i> -C <sub>4</sub> H <sub>3</sub> .C <sub>2</sub> H <sub>2</sub> (cis)             | 3         |
| <i>n</i> -C <sub>4</sub> H <sub>3</sub> .C <sub>2</sub> H <sub>2</sub> (trans)           | 3         |
| lctt                                                                                     | 4         |
| lctc                                                                                     | 4         |
| lcct                                                                                     | 5         |
| lccc                                                                                     | 5         |
| ltct                                                                                     | 6         |
| C4Y-1                                                                                    | 6         |
| FLV-1                                                                                    | 7         |
| Phenyl                                                                                   | 7         |
| l-C <sub>6</sub> H <sub>4</sub> .H                                                       | 8         |
| <b>n-C<sub>4</sub>H<sub>3</sub>+C<sub>2</sub>H<sub>2</sub> : Transition states</b>       | <b>8</b>  |
| TS( <i>n</i> -C <sub>4</sub> H <sub>3</sub> .C <sub>2</sub> H <sub>2</sub> (cis)→lctt)   | 8         |
| TS( <i>n</i> -C <sub>4</sub> H <sub>3</sub> .C <sub>2</sub> H <sub>2</sub> (cis)→lcct)   | 10        |
| TS( <i>n</i> -C <sub>4</sub> H <sub>3</sub> .C <sub>2</sub> H <sub>2</sub> (trans)→ltct) | 10        |
| TS(lctt→lctc)                                                                            | 11        |
| TS(lctt→lcct)                                                                            | 11        |
| TS(lctc→lccc)                                                                            | 12        |
| TS(lcct→lccc)                                                                            | 12        |
| TS(lctc→l-C <sub>6</sub> H <sub>4</sub> + H)                                             | 13        |
| TS(lccc→l-C <sub>6</sub> H <sub>4</sub> + H)                                             | 13        |
| TS(lccc→C4Y-1)                                                                           | 14        |
| TS(lccc→FLV-1)                                                                           | 14        |
| TS(lccc→Phenyl)                                                                          | 15        |
| <b>i-C<sub>4</sub>H<sub>3</sub>+C<sub>2</sub>H<sub>2</sub> : Minima</b>                  | <b>15</b> |
| <i>i</i> -C <sub>4</sub> H <sub>3</sub> .C <sub>2</sub> H <sub>2</sub>                   | 15        |
| bcc                                                                                      | 16        |
| bct                                                                                      | 16        |
| btt                                                                                      | 17        |
| btc                                                                                      | 17        |
| C4Y-2                                                                                    | 18        |
| C4                                                                                       | 18        |
| FLV-2                                                                                    | 19        |
| b-C <sub>6</sub> H <sub>4</sub> .H                                                       | 19        |
| <b>i-C<sub>4</sub>H<sub>3</sub>+C<sub>2</sub>H<sub>2</sub> : Transition states</b>       | <b>20</b> |
| TS( <i>i</i> -C <sub>4</sub> H <sub>3</sub> .C <sub>2</sub> H <sub>2</sub> →bct)         | 20        |
| TS(bct→btt)                                                                              | 20        |
| TS(bct→bcc)                                                                              | 21        |
| TS(bcc→btc)                                                                              | 21        |
| TS(btt→btc)                                                                              | 22        |
| TS(bcc→b-C <sub>6</sub> H <sub>4</sub> +H)                                               | 22        |
| TS(btc→b-C <sub>6</sub> H <sub>4</sub> +H)                                               | 23        |
| TS(bcc→C4Y-2)                                                                            | 23        |
| TS(btc→C4)                                                                               | 24        |
| TS(btc→FLV-2)                                                                            | 24        |
| <b>Hydrogen shifts</b>                                                                   | <b>25</b> |
| TS(FLV-1→FLV-2)                                                                          | 25        |
| TS(C4Y-1→C4Y-2)                                                                          | 25        |
| <b>Non interacting fragments</b>                                                         | <b>26</b> |
| <i>n</i> -C <sub>4</sub> H <sub>3</sub> (HCCH cis)                                       | 26        |

Supplementary Material for PCCP  
This journal is © The Owner Societies 2010

|                                              |           |
|----------------------------------------------|-----------|
| n-C <sub>4</sub> H <sub>3</sub> (HCCH trans) | 26        |
| i-C <sub>4</sub> H <sub>3</sub>              | 26        |
| C <sub>2</sub> H <sub>2</sub>                | 28        |
| l-C <sub>6</sub> H <sub>4</sub> (cis)        | 28        |
| b-C <sub>6</sub> H <sub>4</sub>              | 29        |
| o-C <sub>6</sub> H <sub>4</sub>              | 29        |
| m-C <sub>6</sub> H <sub>4</sub>              | 30        |
| p-C <sub>6</sub> H <sub>4</sub>              | 30        |
| <b>Relative Gibbs free energies</b>          | <b>31</b> |

## Supporting information

Supporting information contains structures of all minima and transition states. It also contains rotational constants (GHZ) and scaled (0.96) vibrational frequencies ( $\text{cm}^{-1}$ ).

### *n*-C<sub>4</sub>H<sub>3</sub>+C<sub>2</sub>H<sub>2</sub> : Minima

#### *n*-C<sub>4</sub>H<sub>3</sub>-C<sub>2</sub>H<sub>2</sub> (cis)

Structure

| Center Number | Atomic Number | Coordinates X | (Angstroms) Y | Z         |
|---------------|---------------|---------------|---------------|-----------|
| 1             | 6             | 1.221728      | 1.856919      | -0.000284 |
| 2             | 6             | 1.525738      | 0.685002      | 0.000063  |
| 3             | 6             | 1.938796      | -0.680984     | 0.000555  |
| 4             | 6             | 1.119236      | -1.719611     | -0.000696 |
| 5             | 6             | -2.280065     | 0.16085       | 0.000002  |
| 6             | 6             | -3.438571     | -0.172915     | 0.000185  |
| 7             | 1             | 0.942883      | 2.886385      | -0.000554 |
| 8             | 1             | 3.022607      | -0.8555       | 0.002043  |
| 9             | 1             | 1.229704      | -2.796171     | -0.000629 |
| 10            | 1             | -4.462715     | -0.470489     | 0.000337  |
| 11            | 1             | -1.253655     | 0.46021       | -0.000146 |

Vibrational frequencies

|           |            |            |             |             |             |
|-----------|------------|------------|-------------|-------------|-------------|
| 16.016448 | 222.727872 | 563.356128 | 778.307712  | 1999.000608 | 3352.399104 |
| 16.274304 | 337.198272 | 620.91648  | 792.963744  | 2132.082816 | 3386.531232 |
| 62.137824 | 516.170496 | 657.350016 | 984.037824  | 2932.288128 |             |
| 66.289728 | 528.71712  | 767.308224 | 1229.700192 | 3142.024704 |             |
| 85.685952 | 535.084032 | 768.52848  | 1587.218112 | 3282.651264 |             |

Rotational constants (GHZ)

4.76068 1.47106 1.12380

#### *n*-C<sub>4</sub>H<sub>3</sub>-C<sub>2</sub>H<sub>2</sub> (trans)

Structure

| Center Number | Atomic Number | Coordinates X | (Angstroms) Y | Z         |
|---------------|---------------|---------------|---------------|-----------|
| 1             | 6             | -3.213108     | -0.797726     | 0.001838  |
| 2             | 6             | -2.093467     | -0.337663     | -0.000234 |
| 3             | 6             | -0.763503     | 0.185111      | -0.002475 |
| 4             | 6             | -0.492015     | 1.480878      | -0.001833 |
| 5             | 6             | 2.85523       | 0.229597      | 0.003748  |
| 6             | 6             | 3.512995      | -0.780678     | -0.001288 |
| 7             | 1             | -4.202975     | -1.19414      | 0.003813  |
| 8             | 1             | 0.056701      | -0.536618     | -0.004681 |
| 9             | 1             | -1.049439     | 2.409306      | -0.000049 |
| 10            | 1             | 2.254567      | 1.112776      | 0.008018  |
| 11            | 1             | 4.104358      | -1.668436     | -0.005638 |

### Vibrational frequencies

|           |            |            |             |             |             |
|-----------|------------|------------|-------------|-------------|-------------|
| 21.8472   | 212.185536 | 562.270368 | 844.299744  | 2000.413248 | 3355.135872 |
| 25.669536 | 352.069632 | 602.625312 | 857.157216  | 2128.081824 | 3390.371424 |
| 54.547488 | 494.853312 | 668.507136 | 969.258432  | 3002.372736 |             |
| 62.3592   | 527.092608 | 752.162496 | 1241.180352 | 3133.230336 |             |
| 81.517728 | 548.953824 | 753.511776 | 1572.035808 | 3291.049728 |             |

### Rotational constants (GHZ)

9.13873 1.06775 0.95605

## lctt

### Structure

| Center Number | Atomic Number | Coordinates X | (Angstroms) Y | Z |
|---------------|---------------|---------------|---------------|---|
| 1             | 6             | -1.415423     | -2.237534     | 0 |
| 2             | 6             | -1.280471     | -1.03282      | 0 |
| 3             | 6             | -1.166626     | 0.382099      | 0 |
| 4             | 6             | 0             | 1.06999       | 0 |
| 5             | 6             | 1.325438      | 0.458942      | 0 |
| 6             | 6             | 2.462111      | 1.135924      | 0 |
| 7             | 1             | -1.526349     | -3.297053     | 0 |
| 8             | 1             | -2.100607     | 0.940245      | 0 |
| 9             | 1             | -0.045143     | 2.155936      | 0 |
| 10            | 1             | 1.349409      | -0.632226     | 0 |
| 11            | 1             | 2.772521      | 2.173498      | 0 |

### Vibrational frequencies

|            |            |            |             |             |             |
|------------|------------|------------|-------------|-------------|-------------|
| 125.55792  | 484.002336 | 756.576    | 1068.75504  | 1587.712608 | 3118.266048 |
| 133.875936 | 559.858848 | 821.71776  | 1195.276896 | 2121.58704  | 3349.789344 |
| 272.25792  | 617.893056 | 883.21872  | 1222.118304 | 3005.405856 |             |
| 290.683872 | 659.844384 | 909.0384   | 1365.722112 | 3037.859136 |             |
| 393.924768 | 673.84752  | 948.880608 | 1559.60016  | 3062.238624 |             |

### Rotational constants (GHZ)

10.24659 2.02978 1.69418

## lctc

### Structure

| Center Number | Atomic Number | Coordinates X | (Angstroms) Y | Z |
|---------------|---------------|---------------|---------------|---|
| 1             | 6             | -1.465265     | -2.183006     | 0 |
| 2             | 6             | -1.312964     | -0.980199     | 0 |
| 3             | 6             | -1.177865     | 0.433226      | 0 |
| 4             | 6             | 0             | 1.101072      | 0 |
| 5             | 6             | 1.31072       | 0.470203      | 0 |
| 6             | 6             | 2.460003      | 1.125693      | 0 |
| 7             | 1             | -1.592777     | -3.240544     | 0 |
| 8             | 1             | -2.103092     | 1.005339      | 0 |
| 9             | 1             | -0.021707     | 2.187192      | 0 |
| 10            | 1             | 1.317998      | -0.626072     | 0 |
| 11            | 1             | 3.511798      | 0.872153      | 0 |

### Vibrational frequencies

|            |            |            |             |             |             |
|------------|------------|------------|-------------|-------------|-------------|
| 124.504128 | 479.854944 | 761.78928  | 1086.006624 | 1600.075584 | 3130.514592 |
| 156.470304 | 556.746432 | 777.996768 | 1192.456128 | 2120.620992 | 3350.630112 |
| 269.309664 | 616.316544 | 830.271648 | 1213.636032 | 2943.500064 |             |
| 295.3296   | 652.124928 | 913.26768  | 1367.900448 | 3041.25264  |             |
| 412.18368  | 684.900864 | 951.155424 | 1561.486464 | 3068.777568 |             |

### Rotational constants (GHZ)

9.82221 2.04590 1.69322

## lcct

### Structure

| Center<br>Number | Atomic<br>Number | Coordinates<br>X | (Angstroms)<br>Y | Z |
|------------------|------------------|------------------|------------------|---|
| 1                | 6                | 2.363764         | 0.086708         | 0 |
| 2                | 6                | 1.257093         | 0.584226         | 0 |
| 3                | 6                | 0                | 1.238361         | 0 |
| 4                | 6                | -1.217068        | 0.645388         | 0 |
| 5                | 6                | -1.539113        | -0.786831        | 0 |
| 6                | 6                | -0.704171        | -1.813384        | 0 |
| 7                | 1                | 3.327917         | -0.366362        | 0 |
| 8                | 1                | 0.03626          | 2.326024         | 0 |
| 9                | 1                | -2.079373        | 1.308308         | 0 |
| 10               | 1                | -2.609447        | -1.006125        | 0 |
| 11               | 1                | 0.361615         | -1.988656        | 0 |

### Vibrational frequencies

|            |            |            |             |             |             |
|------------|------------|------------|-------------|-------------|-------------|
| 88.67952   | 484.607712 | 741.81984  | 987.633408  | 1605.468864 | 3156.24576  |
| 146.319072 | 563.069184 | 835.396032 | 1211.162496 | 2114.385408 | 3349.395168 |
| 278.554464 | 608.976864 | 863.076768 | 1244.10048  | 2982.990144 |             |
| 291.170112 | 658.641696 | 908.59104  | 1378.0992   | 3032.410464 |             |
| 433.78272  | 703.059168 | 944.563776 | 1544.833248 | 3052.618656 |             |

### Rotational constants (GHZ)

6.62282 2.95280 2.04226

## lccc

### Structure

| Center<br>Number | Atomic<br>Number | Coordinates<br>X | (Angstroms)<br>Y | Z |
|------------------|------------------|------------------|------------------|---|
| 1                | 6                | 2.339528         | 0.072408         | 0 |
| 2                | 6                | 1.244492         | 0.59512          | 0 |
| 3                | 6                | 0                | 1.270662         | 0 |
| 4                | 6                | -1.213279        | 0.669215         | 0 |
| 5                | 6                | -1.476983        | -0.767523        | 0 |
| 6                | 6                | -0.576164        | -1.73805         | 0 |
| 7                | 1                | 3.285496         | -0.416981        | 0 |
| 8                | 1                | 0.041206         | 2.357768         | 0 |
| 9                | 1                | -2.088189        | 1.31412          | 0 |
| 10               | 1                | -2.53787         | -1.046139        | 0 |
| 11               | 1                | -0.606209        | -2.819758        | 0 |

### Vibrational frequencies

|            |            |            |             |             |             |
|------------|------------|------------|-------------|-------------|-------------|
| 118.927104 | 477.211488 | 734.672256 | 995.986944  | 1604.58576  | 3125.437344 |
| 122.246688 | 567.041184 | 820.617792 | 1199.1744   | 2114.373504 | 3352.011552 |
| 248.419488 | 604.03296  | 824.939616 | 1233.858432 | 2927.177088 |             |
| 297.518496 | 635.905056 | 925.16832  | 1381.573152 | 3038.28336  |             |
| 453.429792 | 697.449504 | 941.376576 | 1551.412992 | 3060.935136 |             |

### Rotational constants (GHZ)

6.38156 3.08159 2.07810

## Itct

### Structure

| Center<br>Number | Atomic<br>Number | Coordinates (Angstroms) |           |           |
|------------------|------------------|-------------------------|-----------|-----------|
|                  |                  | X                       | Y         | Z         |
| 1                | 6                | -3.033404               | -0.027677 | -0.053861 |
| 2                | 6                | -1.822356               | -0.156055 | 0.018817  |
| 3                | 6                | -0.418268               | -0.348915 | 0.106813  |
| 4                | 6                | 0.493585                | 0.651249  | -0.026593 |
| 5                | 6                | 1.963607                | 0.493077  | 0.039852  |
| 6                | 6                | 2.658919                | -0.635043 | -0.073240 |
| 7                | 1                | -4.103422               | 0.104204  | -0.117645 |
| 8                | 1                | -0.076650               | -1.365237 | 0.301848  |
| 9                | 1                | 0.132588                | 1.665408  | -0.185522 |
| 10               | 1                | 2.519829                | 1.423576  | 0.178509  |
| 11               | 1                | 2.475154                | -1.687771 | -0.247922 |

### Vibrational frequencies

|            |            |            |             |             |             |
|------------|------------|------------|-------------|-------------|-------------|
| 61,19136   | 475,471008 | 805,34304  | 1032,1368   | 1614,552096 | 3131,222304 |
| 143,317344 | 544,346208 | 859,476672 | 1226,469792 | 2125,17312  | 3355,0632   |
| 175,335648 | 552,011424 | 874,74912  | 1271,931552 | 2991,56064  |             |
| 254,840256 | 605,375616 | 950,115744 | 1294,504896 | 3032,770848 |             |
| 440,020896 | 641,088768 | 967,203744 | 1557,163488 | 3055,303872 |             |

### Rotational constants (GHZ)

20.64276 1.61272 1.50023

## C4Y-1

### Structure

| Center<br>Number | Atomic<br>Number | Coordinates (Angstroms) |           |           |
|------------------|------------------|-------------------------|-----------|-----------|
|                  |                  | X                       | Y         | Z         |
| 1                | 6                | 2.511375                | -0.000389 | -0.347655 |
| 2                | 6                | 1.384080                | 0.000669  | 0.087766  |
| 3                | 6                | 0.027455                | 0.000249  | 0.624500  |
| 4                | 6                | -0.969800               | 1.021353  | 0.035112  |
| 5                | 6                | -1.796675               | -0.000584 | -0.434267 |
| 6                | 6                | -0.969135               | -1.020988 | 0.034899  |
| 7                | 1                | 3.499424                | -0.001659 | -0.748190 |
| 8                | 1                | 0.053489                | 0.000261  | 1.723384  |
| 9                | 1                | -0.964999               | 2.103286  | -0.008397 |
| 10               | 1                | -2.744634               | -0.000643 | -0.964006 |
| 11               | 1                | -0.967076               | -2.103107 | -0.004924 |

-----  
Vibrational frequencies

|            |            |            |             |             |             |
|------------|------------|------------|-------------|-------------|-------------|
| 149.875104 | 523.578336 | 881.321664 | 1088.764896 | 1405.448064 | 3131.627424 |
| 177.562656 | 570.21552  | 882.870048 | 1142.31168  | 2142.99792  | 3355.7472   |
| 358.297248 | 583.418592 | 909.486048 | 1163.38512  | 2916.260352 |             |
| 466.206528 | 584.00784  | 941.20848  | 1284.94176  | 3087.532128 |             |
| 479.12448  | 827.644512 | 991.905024 | 1288.360992 | 3121.010976 |             |

Rotational constants (GHZ)

10.76365 2.59454 2.34276

**FLV-1**

Structure

-----

| Center<br>Number | Atomic<br>Number | Coordinates (Angstroms) |           |   |
|------------------|------------------|-------------------------|-----------|---|
|                  |                  | X                       | Y         | Z |
| 1                | 6                | -1.165294               | -0.095633 | 0 |
| 2                | 6                | 0                       | 0.826997  | 0 |
| 3                | 6                | 1.201671                | -0.035166 | 0 |
| 4                | 6                | 0.787501                | -1.32374  | 0 |
| 5                | 6                | -0.683933               | -1.360515 | 0 |
| 6                | 6                | -0.034943               | 2.151089  | 0 |
| 7                | 1                | -0.795239               | 2.922947  | 0 |
| 8                | 1                | 2.21571                 | 0.342267  | 0 |
| 9                | 1                | 1.423259                | -2.202145 | 0 |
| 10               | 1                | -1.275819               | -2.26946  | 0 |
| 11               | 1                | -2.197926               | 0.228199  | 0 |

-----

Vibrational frequencies

|            |            |             |             |             |             |
|------------|------------|-------------|-------------|-------------|-------------|
| 200.035872 | 668.720544 | 871.834368  | 1074.382944 | 1565.268672 | 3128.617824 |
| 315.898752 | 710.705376 | 886.761216  | 1131.350592 | 1602.188832 | 3133.781184 |
| 496.830528 | 757.828224 | 900.729888  | 1267.546848 | 3092.546016 |             |
| 605.904288 | 771.191232 | 973.891296  | 1342.988448 | 3104.832864 |             |
| 651.139776 | 823.450368 | 1070.826624 | 1481.623584 | 3127.19376  |             |

Rotational constants (GHZ)

8.33841 4.00588 2.70592

**Phenyl**

Structure

-----

| Center<br>Number | Atomic<br>Number | Coordinates (Angstroms) |             |             |
|------------------|------------------|-------------------------|-------------|-------------|
|                  |                  | X                       | Y           | Z           |
| 1                | 6                | 0.0000000               | 0.0000000   | -1.40031705 |
| 2                | 6                | 0.0000000               | -1.22655589 | -0.77144436 |
| 3                | 6                | 0.0000000               | -1.21379145 | 0.63308210  |
| 4                | 6                | 0.0000000               | 0.0000000   | 1.32475219  |
| 5                | 6                | 0.0000000               | 1.21379145  | 0.63308210  |
| 6                | 6                | 0.0000000               | 1.22655589  | -0.77144436 |
| 7                | 1                | 0.0000000               | -2.16357742 | -1.32206191 |
| 8                | 1                | 0.0000000               | -2.15400271 | 1.17993864  |
| 9                | 1                | 0.0000000               | 0.0000000   | 2.41136278  |
| 10               | 1                | 0.0000000               | 2.15400271  | 1.17993864  |
| 11               | 1                | 0.0000000               | 2.16357742  | -1.32206191 |

-----

-----  
Vibrational frequencies

|            |            |             |             |             |             |
|------------|------------|-------------|-------------|-------------|-------------|
| 386.934912 | 694.887456 | 947.714496  | 1139.717856 | 1531.130688 | 3070.650432 |
| 411.478464 | 784.290816 | 982.911936  | 1266.462048 | 1581.638112 | 3079.649376 |
| 577.308096 | 855.176928 | 1017.732864 | 1289.91216  | 3048.88368  |             |
| 593.990592 | 918.604032 | 1039.996896 | 1418.925984 | 3055.161888 |             |
| 645.450144 | 947.440032 | 1139.626368 | 1431.20688  | 3068.294784 |             |

Rotational constants (GHZ)  
6.26824 5.59969 2.95757

**I-C<sub>6</sub>H<sub>4</sub>.H**

Structure

-----

| Center Number | Atomic Number | Coordinates X | (Angstroms) Y | Z |
|---------------|---------------|---------------|---------------|---|
| 1             | 6             | -1.547331     | -2.060652     | 0 |
| 2             | 6             | -1.355364     | -0.864752     | 0 |
| 3             | 6             | -1.188877     | 0.542668      | 0 |
| 4             | 6             | 0.000000      | 1.192245      | 0 |
| 5             | 6             | 1.274238      | 0.571986      | 0 |
| 6             | 6             | 2.385334      | 0.089084      | 0 |
| 7             | 1             | -1.689563     | -3.117401     | 0 |
| 8             | 1             | -2.098224     | 1.140831      | 0 |
| 9             | 1             | -0.010396     | 2.280569      | 0 |
| 10            | 1             | 3.038816      | 3.234799      | 0 |
| 11            | 1             | 3.351369      | -0.362268     | 0 |

-----

Vibrational frequencies

|           |            |            |             |             |             |
|-----------|------------|------------|-------------|-------------|-------------|
| 16.076832 | 222.727776 | 563.38848  | 778.220064  | 1999.00464  | 3352.42848  |
| 16.242912 | 337.148256 | 620.964576 | 792.965088  | 2132.059488 | 3386.568288 |
| 61.950336 | 516.130848 | 657.347712 | 983.979648  | 2932.237728 |             |
| 66.216192 | 528.7488   | 767.29296  | 1229.656032 | 3142.093536 |             |
| 85.722912 | 535.14624  | 768.371616 | 1587.235296 | 3282.728928 |             |

Rotational constants (GHZ)  
4.75991 1.47286 1.12481

***n*-C<sub>4</sub>H<sub>3</sub>+C<sub>2</sub>H<sub>2</sub> : Transition states**

**TS(*n*-C<sub>4</sub>H<sub>3</sub>.C<sub>2</sub>H<sub>2</sub> (cis)→Ictt)**

Structure

-----

| Center Number | Atomic Number | Coordinates X | (Angstroms) Y | Z        |
|---------------|---------------|---------------|---------------|----------|
| 1             | 6             | -1.940251     | -1.680128     | 0.000000 |
| 2             | 6             | -1.603023     | -0.516886     | 0.000000 |
| 3             | 6             | -1.244880     | 0.865231      | 0.000000 |
| 4             | 6             | 0.000000      | 1.327078      | 0.000000 |
| 5             | 6             | 1.771090      | -0.325103     | 0.000000 |
| 6             | 6             | 2.880444      | 0.175418      | 0.000000 |
| 7             | 1             | -2.232502     | -2.705583     | 0.000000 |

-----



Supplementary Material for PCCP  
This journal is © The Owner Societies 2010

|    |   |           |           |          |
|----|---|-----------|-----------|----------|
| 8  | 1 | -2.082734 | 1.573649  | 0.000000 |
| 9  | 1 | 0.390258  | 2.337417  | 0.000000 |
| 10 | 1 | 0.964536  | -1.027840 | 0.000000 |
| 11 | 1 | 3.780158  | 0.748701  | 0.000000 |

-----  
Vibrational frequencies

|             |            |            |             |             |             |
|-------------|------------|------------|-------------|-------------|-------------|
| i272.123904 | 250.657056 | 571.682496 | 815.832672  | 1909.9872   | 3353.939808 |
| 60.62832    | 343.904832 | 617.187744 | 826.481568  | 2128.868448 | 3367.662336 |
| 85.785792   | 549.203328 | 676.83408  | 994.187808  | 2936.19456  |             |
| 90.499488   | 549.995136 | 753.33936  | 1226.909472 | 3123.869472 |             |
| 201.5112    | 556.902336 | 768.323712 | 1574.63952  | 3274.668384 |             |

Rotational constants (GHZ)

|           |           |           |
|-----------|-----------|-----------|
| 6.5998759 | 1.9002788 | 1.4754560 |
|-----------|-----------|-----------|

### TS(n-C<sub>4</sub>H<sub>3</sub>.C<sub>2</sub>H<sub>2</sub> (cis)→lcct)

Structure

| Center Number | Atomic Number | Coordinates X | (Angstroms) Y | Z        |
|---------------|---------------|---------------|---------------|----------|
| 1             | 6             | -1.025044     | 2.110233      | 0.000000 |
| 2             | 6             | 0.000000      | 1.465397      | 0.000000 |
| 3             | 6             | 1.258326      | 0.795030      | 0.000000 |
| 4             | 6             | 1.458815      | -0.517348     | 0.000000 |
| 5             | 6             | -0.367207     | -2.148553     | 0.000000 |
| 6             | 6             | -1.440138     | -1.575174     | 0.000000 |
| 7             | 1             | -1.937258     | 2.661999      | 0.000000 |
| 8             | 1             | 2.134232      | 1.456602      | 0.000000 |
| 9             | 1             | 2.392359      | -1.071915     | 0.000000 |
| 10            | 1             | 0.374473      | -2.915975     | 0.000000 |
| 11            | 1             | -2.272321     | -0.908226     | 0.000000 |

Vibrational frequencies

|              |            |            |             |             |             |
|--------------|------------|------------|-------------|-------------|-------------|
| i 263.600928 | 265.778016 | 562.289568 | 819.6216    | 1918.932192 | 3354.9072   |
| 25.991904    | 340.730016 | 607.781184 | 826.765536  | 2129.791296 | 3381.817248 |
| 88.059744    | 552.493344 | 671.113728 | 1010.465856 | 2930.77536  |             |
| 105.139584   | 554.986656 | 737.104704 | 1234.37616  | 3087.578784 |             |
| 176.904672   | 558.714624 | 739.67856  | 1582.559424 | 3300.555744 |             |

Rotational constants (GHZ)

4.9521050 2.5773782 1.6951293

### TS(n-C<sub>4</sub>H<sub>3</sub>.C<sub>2</sub>H<sub>2</sub> (trans)→ltct)

Structure

| Center Number | Atomic Number | Coordinates X | (Angstroms) Y | Z         |
|---------------|---------------|---------------|---------------|-----------|
| 1             | 6             | -3.234496     | -0.142566     | -0.055992 |
| 2             | 6             | -2.029265     | -0.162479     | 0.061531  |
| 3             | 6             | -0.609177     | -0.203566     | 0.212269  |
| 4             | 6             | 0.204966      | 0.741153      | -0.243533 |
| 5             | 6             | 2.550691      | 0.402053      | 0.246678  |
| 6             | 6             | 2.922068      | -0.668778     | -0.197867 |
| 7             | 1             | -4.294472     | -0.114450     | -0.166683 |
| 8             | 1             | -0.191230     | -1.064217     | 0.737973  |
| 9             | 1             | 0.024940      | 1.655865      | -0.799038 |
| 10            | 1             | 2.547158      | 1.348739      | 0.740610  |
| 11            | 1             | 3.084886      | -1.620840     | -0.651381 |

Vibrational frequencies

|              |            |            |             |             |             |
|--------------|------------|------------|-------------|-------------|-------------|
| i 277.317984 | 242.27712  | 562.233984 | 868.101792  | 1910.2584   | 3355.333824 |
| 39.769056    | 363.123744 | 597.576864 | 879.85392   | 2124.972384 | 3374.258688 |
| 58.582848    | 502.921152 | 690.372768 | 979.895328  | 3008.24496  |             |
| 81.756864    | 549.380352 | 724.473696 | 1242.470784 | 3099.237792 |             |
| 179.459328   | 556.894752 | 740.79744  | 1566.62736  | 3294.681696 |             |

Rotational constants (GHZ)

17.9922404 1.2636870 1.2074749

## TS(lctt→lctc)

### Structure

| Center<br>Number | Atomic<br>Number | Coordinates<br>X | (Angstroms)<br>Y | Z        |
|------------------|------------------|------------------|------------------|----------|
| 1                | 6                | -1.464346        | -2.203487        | 0.000000 |
| 2                | 6                | -1.307178        | -1.001381        | 0.000000 |
| 3                | 6                | -1.174330        | 0.412427         | 0.000000 |
| 4                | 6                | 0.000000         | 1.086177         | 0.000000 |
| 5                | 6                | 1.319994         | 0.456192         | 0.000000 |
| 6                | 6                | 2.463504         | 1.102154         | 0.000000 |
| 7                | 1                | -1.592602        | -3.260980        | 0.000000 |
| 8                | 1                | -2.101828        | 0.981306         | 0.000000 |
| 9                | 1                | -0.026519        | 2.172220         | 0.000000 |
| 10               | 1                | 1.308233         | -0.641353        | 0.000000 |
| 11               | 1                | 3.386855         | 1.636318         | 0.000000 |

### Vibrational frequencies

|                     |            |            |             |             |             |
|---------------------|------------|------------|-------------|-------------|-------------|
| <i>i</i> 719.430336 | 419.849856 | 686.632032 | 1045.655424 | 1586.041056 | 3315.545856 |
| 126.61968           | 493.591104 | 745.665984 | 1185.104832 | 2120.878656 | 3350.212416 |
| 140.710464          | 558.860544 | 832.6584   | 1228.02672  | 2920.293408 |             |
| 272.376             | 585.561312 | 891.524256 | 1362.569088 | 3038.05728  |             |
| 301.110144          | 615.67344  | 949.132992 | 1563.878496 | 3067.683744 |             |

### Rotational constants (GHZ)

10.10024 2.02247 1.68505

## TS(lctt→lcct)

### Structure

| Center<br>Number | Atomic<br>Number | Coordinates<br>X | (Angstroms)<br>Y | Z         |
|------------------|------------------|------------------|------------------|-----------|
| 1                | 6                | -2.332628        | -0.872888        | 0.049752  |
| 2                | 6                | -1.504779        | 0.005683         | -0.047224 |
| 3                | 6                | -0.577727        | 1.077227         | -0.174570 |
| 4                | 6                | 0.744634         | 0.991514         | 0.057767  |
| 5                | 6                | 1.459977         | -0.243623        | 0.496561  |
| 6                | 6                | 2.046098         | -1.070887        | -0.340181 |
| 7                | 1                | -3.044170        | -1.660523        | 0.139808  |
| 8                | 1                | -0.992068        | 2.036560         | -0.481468 |
| 9                | 1                | 1.347073         | 1.889526         | -0.070717 |
| 10               | 1                | 1.497003         | -0.438653        | 1.571997  |
| 11               | 1                | 2.178713         | -1.149065        | -1.412252 |

### Vibrational frequencies

|                     |            |            |             |             |             |
|---------------------|------------|------------|-------------|-------------|-------------|
| <i>i</i> 131.375808 | 543.0744   | 733.635936 | 999.312288  | 1611.091584 | 3119.51328  |
| 123.661152          | 574.61856  | 818.351232 | 1191.110112 | 2131.963968 | 3350.651136 |
| 210.43632           | 580.41024  | 845.4408   | 1202.345664 | 2975.415168 |             |
| 311.84208           | 614.259072 | 906.048288 | 1352.83584  | 3022.696608 |             |
| 352.415328          | 712.86096  | 940.467744 | 1595.090208 | 3041.168352 |             |

### Rotational constants (GHZ)

7.12424 2.43276 1.94711

### TS(lctc→lccc)

#### Structure

| Center Number | Atomic Number | Coordinates X | (Angstroms) Y | Z         |
|---------------|---------------|---------------|---------------|-----------|
| 1             | 6             | -2.301271     | -0.949651     | 0.051821  |
| 2             | 6             | -1.514127     | -0.034001     | -0.040066 |
| 3             | 6             | -0.638345     | 1.081816      | -0.154859 |
| 4             | 6             | 0.692267      | 1.046394      | 0.033936  |
| 5             | 6             | 1.470748      | -0.164532     | 0.413148  |
| 6             | 6             | 2.059311      | -0.979855     | -0.431942 |
| 7             | 1             | -2.976746     | -1.769217     | 0.133681  |
| 8             | 1             | -1.103679     | 2.031958      | -0.412730 |
| 9             | 1             | 1.249182      | 1.976148      | -0.071965 |
| 10            | 1             | 1.563025      | -0.359396     | 1.491598  |
| 11            | 1             | 2.656712      | -1.880529     | -0.372807 |

#### Vibrational frequencies

|              |            |            |             |             |             |
|--------------|------------|------------|-------------|-------------|-------------|
| i 158.544096 | 543.0672   | 720.247008 | 1010.945664 | 1634.591616 | 3126.978144 |
| 120.653664   | 551.56368  | 769.941024 | 1200.22752  | 2134.036416 | 3356.269152 |
| 216.380256   | 572.174016 | 812.478336 | 1211.265312 | 2898.343296 |             |
| 309.319872   | 605.7      | 912.151488 | 1367.319936 | 3027.546528 |             |
| 359.047872   | 716.270208 | 941.835168 | 1602.097536 | 3045.440064 |             |

#### Rotational constants (GHZ)

7.01797 2.44120 1.90948

### TS(lcct→lccc)

#### Structure

| Center Number | Atomic Number | Coordinates X | (Angstroms) Y | Z         |
|---------------|---------------|---------------|---------------|-----------|
| 1             | 6             | -2.332628     | -0.872888     | 0.049752  |
| 2             | 6             | -1.504779     | 0.005683      | -0.047224 |
| 3             | 6             | -0.577727     | 1.077227      | -0.174570 |
| 4             | 6             | 0.744634      | 0.991514      | 0.057767  |
| 5             | 6             | 1.459977      | -0.243623     | 0.496561  |
| 6             | 6             | 2.046098      | -1.070887     | -0.340181 |
| 7             | 1             | -3.044170     | -1.660523     | 0.139808  |
| 8             | 1             | -0.992068     | 2.036560      | -0.481468 |
| 9             | 1             | 1.347073      | 1.889526      | -0.070717 |
| 10            | 1             | 1.497003      | -0.438653     | 1.571997  |
| 11            | 1             | 2.178713      | -1.149065     | -1.412252 |

#### Vibrational frequencies

|             |            |            |             |             |             |
|-------------|------------|------------|-------------|-------------|-------------|
| i 699.91536 | 463.851744 | 710.212032 | 984.035424  | 1605.317184 | 3322.40784  |
| 109.2096    | 494.97552  | 757.852608 | 1198.916928 | 2114.384544 | 3350.700576 |
| 131.380704  | 567.260832 | 809.05488  | 1240.14384  | 2892.870816 |             |
| 258.95568   | 590.000928 | 867.201696 | 1373.835168 | 3034.490112 |             |
| 298.698528  | 600.855264 | 941.776608 | 1546.244352 | 3054.904512 |             |

#### Rotational constants (GHZ)

7.12424 2.43276 1.94711

### TS(Ictc→I-C<sub>6</sub>H<sub>4</sub> + H)

#### Structure

| Center Number | Atomic Number | Coordinates X | (Angstroms) Y | Z         |
|---------------|---------------|---------------|---------------|-----------|
| 1             | 6             | 2.376827      | -0.968488     | -0.062997 |
| 2             | 6             | 1.575887      | -0.059906     | -0.029616 |
| 3             | 6             | 0.710904      | 1.062468      | -0.011577 |
| 4             | 6             | -0.640757     | 1.032862      | 0.027962  |
| 5             | 6             | -1.479453     | -0.123815     | 0.052814  |
| 6             | 6             | -2.451736     | -0.843214     | -0.142597 |
| 7             | 1             | 3.051577      | -1.793870     | -0.084896 |
| 8             | 1             | 1.192254      | 2.038268      | -0.044195 |
| 9             | 1             | -1.170274     | 1.983626      | 0.020236  |
| 10            | 1             | -0.437954     | -1.211197     | 1.296282  |
| 11            | 1             | -3.185633     | -1.616267     | -0.191365 |

#### Vibrational frequencies

|            |            |            |             |             |             |
|------------|------------|------------|-------------|-------------|-------------|
| i716.8968  | 372.130176 | 589.928064 | 854.65584   | 1592.90592  | 3341.54304  |
| 75.436416  | 424.347552 | 600.492768 | 923.04432   | 2020.87008  | 3355.157376 |
| 175.241664 | 470.583648 | 614.534496 | 1003.195392 | 2127.073248 |             |
| 238.50432  | 557.287968 | 706.887936 | 1214.54976  | 3041.452032 |             |
| 275.969376 | 581.597088 | 742.811136 | 1375.178688 | 3057.699648 |             |

#### Rotational constants (GHZ)

7.90421 2.18166 1.73381

### TS(Iccc→I-C<sub>6</sub>H<sub>4</sub> + H)

#### Structure

| Center Number | Atomic Number | Coordinates X | (Angstroms) Y | Z        |
|---------------|---------------|---------------|---------------|----------|
| 1             | 6             | 2.288074      | 0.910314      | 0.000000 |
| 2             | 6             | 1.504269      | -0.013254     | 0.000000 |
| 3             | 6             | 0.634573      | -1.131158     | 0.000000 |
| 4             | 6             | -0.719819     | -1.080143     | 0.000000 |
| 5             | 6             | -1.474380     | 0.132243      | 0.000000 |
| 6             | 6             | -1.787014     | 1.315858      | 0.000000 |
| 7             | 1             | 2.959711      | 1.738511      | 0.000001 |
| 8             | 1             | 1.105164      | -2.112791     | 0.000000 |
| 9             | 1             | -1.273067     | -2.013559     | 0.000000 |
| 10            | 1             | -3.235086     | -0.701297     | 0.000004 |
| 11            | 1             | -2.230942     | 2.285971      | 0.000000 |

#### Vibrational frequencies

|             |            |            |             |             |             |
|-------------|------------|------------|-------------|-------------|-------------|
| i659.140896 | 369.447648 | 587.158368 | 868.534176  | 1572.845856 | 3344.725728 |
| 51.856512   | 455.448096 | 601.829184 | 931.827168  | 2028.856128 | 3355.104864 |
| 112.13376   | 484.780128 | 603.333312 | 1003.471008 | 2129.804448 |             |
| 233.395584  | 552.014016 | 720.257664 | 1210.308288 | 3046.79904  |             |
| 271.61952   | 569.092224 | 747.26832  | 1374.98496  | 3085.262784 |             |

#### Rotational constants (GHZ)

6.51119 2.62323 1.86989

### TS(lccc→C4Y-1)

#### Structure

| Center Number | Atomic Number | Coordinates X | (Angstroms) Y | Z         |
|---------------|---------------|---------------|---------------|-----------|
| 1             | 6             | -2.394174     | 0.327956      | -0.313835 |
| 2             | 6             | -1.326807     | -0.127140     | 0.037048  |
| 3             | 6             | -0.141838     | -0.774788     | 0.501046  |
| 4             | 6             | 1.060736      | -0.930956     | -0.256969 |
| 5             | 6             | 1.585936      | 0.371224      | -0.468075 |
| 6             | 6             | 1.021045      | 1.097577      | 0.528720  |
| 7             | 1             | -3.309709     | 0.758709      | -0.648451 |
| 8             | 1             | -0.350783     | -1.517548     | 1.279498  |
| 9             | 1             | 1.586829      | -1.877645     | -0.363535 |
| 10            | 1             | 2.286547      | 0.702687      | -1.234379 |
| 11            | 1             | 0.957727      | 2.150559      | 0.799257  |

#### Vibrational frequencies

|             |            |            |             |             |             |
|-------------|------------|------------|-------------|-------------|-------------|
| i638.275584 | 487.75584  | 740.736192 | 1028.397312 | 1439.031936 | 3063.183744 |
| 160.790784  | 505.119936 | 841.921632 | 1115.600736 | 2110.90272  | 3356.789856 |
| 184.318752  | 605.021856 | 847.526496 | 1200.726912 | 2962.619808 |             |
| 366.052512  | 612.165312 | 886.289568 | 1363.776    | 3028.532352 |             |
| 424.218336  | 711.452736 | 928.265568 | 1373.91792  | 3054.222336 |             |

#### Rotational constants (GHZ)

8.12978 2.78315 2.37195

### TS(lccc→FLV-1)

#### Structure

| Center Number | Atomic Number | Coordinates X | (Angstroms) Y | Z        |
|---------------|---------------|---------------|---------------|----------|
| 1             | 6             | -0.692572     | 2.155090      | 0.000000 |
| 2             | 6             | 0.000000      | 1.134725      | 0.000000 |
| 3             | 6             | 1.184784      | 0.333973      | 0.000000 |
| 4             | 6             | 1.081784      | -1.013145     | 0.000000 |
| 5             | 6             | -0.259888     | -1.597459     | 0.000000 |
| 6             | 6             | -1.292581     | -0.766015     | 0.000000 |
| 7             | 1             | -1.493455     | 2.860575      | 0.000000 |
| 8             | 1             | 2.141708      | 0.847128      | 0.000000 |
| 9             | 1             | 1.962988      | -1.647856     | 0.000000 |
| 10            | 1             | -0.369549     | -2.685300     | 0.000000 |
| 11            | 1             | -2.370853     | -0.857558     | 0.000000 |

#### Vibrational frequencies

|             |            |            |             |             |             |
|-------------|------------|------------|-------------|-------------|-------------|
| i427.027296 | 505.0536   | 731.462112 | 982.882752  | 1602.538272 | 3133.531584 |
| 167.5176    | 507.39456  | 828.399552 | 1138.294368 | 1954.495392 | 3334.250016 |
| 235.775712  | 590.946528 | 836.946816 | 1206.588768 | 2981.364864 |             |
| 325.422144  | 629.016672 | 921.499776 | 1358.246112 | 3073.240416 |             |
| 483.264576  | 707.873664 | 922.577664 | 1526.157312 | 3091.492416 |             |

#### Rotational constants (GHZ)

7.02299 3.50252 2.33700

## TS(lccc→Phenyl)

### Structure

| Center Number | Atomic Number | Coordinates X | (Angstroms) Y | Z        |
|---------------|---------------|---------------|---------------|----------|
| 1             | 6             | -0.696780     | -1.770069     | 0.000000 |
| 2             | 6             | -1.217876     | -0.659639     | 0.000000 |
| 3             | 6             | -1.205835     | 0.752717      | 0.000000 |
| 4             | 6             | 0.000000      | 1.383389      | 0.000000 |
| 5             | 6             | 1.290770      | 0.709044      | 0.000000 |
| 6             | 6             | 1.498907      | -0.610317     | 0.000000 |
| 7             | 1             | -0.483325     | -2.815553     | 0.000000 |
| 8             | 1             | -2.134286     | 1.316520      | 0.000000 |
| 9             | 1             | 0.014072      | 2.471184      | 0.000000 |
| 10            | 1             | 2.162621      | 1.373588      | 0.000000 |
| 11            | 1             | 2.425803      | -1.176494     | 0.000000 |

### Vibrational frequencies

|            |            |            |             |             |            |
|------------|------------|------------|-------------|-------------|------------|
| 316.779648 | 462.76128  | 728.73792  | 1011.699168 | 1576.93392  | 3082.38576 |
| 223.790112 | 541.923168 | 846.93168  | 1172.768832 | 2011.836288 | 3339.05136 |
| 297.52848  | 634.829472 | 861.83856  | 1241.43792  | 2942.50032  |            |
| 341.512896 | 672.536736 | 933.180576 | 1382.364864 | 3052.54464  |            |
| 439.58544  | 725.183424 | 965.424672 | 1502.061984 | 3072.944928 |            |

### Rotational constants (GHZ)

5.57685 4.39147 2.45684

## *i*-C<sub>4</sub>H<sub>3</sub>+C<sub>2</sub>H<sub>2</sub> : Minima

### *i*-C<sub>4</sub>H<sub>3</sub>.C<sub>2</sub>H<sub>2</sub>

### Structure

| Center Number | Atomic Number | Coordinates X | (Angstroms) Y | Z         |
|---------------|---------------|---------------|---------------|-----------|
| 1             | 6             | 0.439312      | 1.940120      | 0.000004  |
| 2             | 6             | 1.121753      | 0.822193      | -0.000006 |
| 3             | 6             | 1.735083      | -0.348369     | -0.000006 |
| 4             | 6             | 2.285076      | -1.458062     | 0.000007  |
| 5             | 6             | -2.058384     | -0.812069     | -0.000004 |
| 6             | 6             | -3.179892     | -0.369520     | 0.000003  |
| 7             | 1             | -0.652931     | 1.941208      | 0.000008  |
| 8             | 1             | 0.925049      | 2.917570      | 0.000004  |
| 9             | 1             | 2.906330      | -2.325002     | 0.000017  |
| 10            | 1             | -1.059763     | -1.190451     | -0.000029 |
| 11            | 1             | -4.176373     | 0.010919      | 0.000019  |

### Vibrational frequencies

|            |            |            |             |             |             |
|------------|------------|------------|-------------|-------------|-------------|
| 24.250272  | 145.477344 | 541.398048 | 858.061056  | 1949.922816 | 3338.792736 |
| 42.768768  | 237.82464  | 560.944032 | 875.124192  | 2000.073696 | 3393.768672 |
| 49.51632   | 240.370944 | 595.9488   | 958.586304  | 2975.203968 |             |
| 88.036512  | 425.575104 | 755.079168 | 1400.624064 | 3037.220544 |             |
| 121.067424 | 534.753024 | 757.66224  | 1739.68512  | 3295.935744 |             |

### Rotational constants (GHZ)

4.63869 1.59462 1.18668

## bcc

### Structure

| Center Number | Atomic Number | Coordinates X | (Angstroms) Y | Z         |
|---------------|---------------|---------------|---------------|-----------|
| 1             | 6             | 2.485663      | -0.593321     | -0.044414 |
| 2             | 6             | 1.358611      | -0.153946     | -0.012574 |
| 3             | 6             | 0.005529      | 0.317055      | 0.030588  |
| 4             | 6             | -0.267600     | 1.637425      | 0.016880  |
| 5             | 6             | -1.047487     | -0.732135     | 0.097956  |
| 6             | 6             | -2.336009     | -0.558219     | -0.117481 |
| 7             | 1             | 3.486590      | -0.959562     | -0.076194 |
| 8             | 1             | -1.292129     | 1.992010      | 0.068945  |
| 9             | 1             | 0.523731      | 2.376092      | -0.045442 |
| 10            | 1             | -0.684004     | -1.736933     | 0.342516  |
| 11            | 1             | -3.226433     | -1.172757     | -0.115554 |

### Vibrational frequencies

|            |            |            |             |             |             |
|------------|------------|------------|-------------|-------------|-------------|
| 46.805088  | 510.335904 | 699.166368 | 958.791648  | 1612.634592 | 3143.354016 |
| 157.915872 | 534.246528 | 712.822848 | 1185.585696 | 2133.955584 | 3354.80448  |
| 264.770304 | 553.64304  | 799.645728 | 1258.151424 | 2947.161696 |             |
| 276.030336 | 603.57888  | 868.945536 | 1389.734112 | 3055.895136 |             |
| 457.503552 | 668.41728  | 888.81072  | 1579.544064 | 3140.919168 |             |

### Rotational constants (GHZ)

7.95056 2.50907 1.91388

## bct

### Structure

| Center Number | Atomic Number | Coordinates X | (Angstroms) Y | Z         |
|---------------|---------------|---------------|---------------|-----------|
| 1             | 6             | -2.484358     | -0.511837     | 0.119890  |
| 2             | 6             | -1.346239     | -0.109737     | 0.031531  |
| 3             | 6             | 0.019736      | 0.304591      | -0.084027 |
| 4             | 6             | 0.360981      | 1.607736      | -0.055485 |
| 5             | 6             | 1.020862      | -0.795325     | -0.248066 |
| 6             | 6             | 2.253418      | -0.773119     | 0.215121  |
| 7             | 1             | -3.494151     | -0.844450     | 0.202228  |
| 8             | 1             | 1.393213      | 1.916714      | -0.185343 |
| 9             | 1             | -0.384237     | 2.382948      | 0.086594  |
| 10            | 1             | 0.657305      | -1.681551     | -0.771253 |
| 11            | 1             | 2.881473      | -0.107515     | 0.793994  |

### Vibrational frequencies

|            |            |            |             |             |             |
|------------|------------|------------|-------------|-------------|-------------|
| 79.279968  | 527.892768 | 706.346688 | 933.783072  | 1611.886368 | 3140.764704 |
| 162.021024 | 540.969888 | 743.13072  | 1187.2848   | 2131.223424 | 3354.58464  |
| 262.704    | 567.54768  | 863.984832 | 1244.487552 | 3010.90992  |             |
| 277.79904  | 602.320512 | 885.199104 | 1390.669344 | 3055.426176 |             |
| 414.966144 | 688.400352 | 888.429216 | 1577.42784  | 3131.702976 |             |

### Rotational constants (GHZ)

7.6590243 2.5652819 1.9650062



## btt

### Structure

| Center<br>Number | Atomic<br>Number | Coordinates<br>X | (Angstroms)<br>Y | Z        |
|------------------|------------------|------------------|------------------|----------|
| 1                | 6                | 1.889784         | -1.276575        | 0.000000 |
| 2                | 6                | 1.034406         | -0.421485        | 0.000000 |
| 3                | 6                | 0.000000         | 0.571092         | 0.000000 |
| 4                | 6                | 0.300685         | 1.886442         | 0.000000 |
| 5                | 6                | -1.410236        | 0.111284         | 0.000000 |
| 6                | 6                | -1.813221        | -1.144318        | 0.000000 |
| 7                | 1                | 2.656169         | -2.018095        | 0.000000 |
| 8                | 1                | -0.483155        | 2.638290         | 0.000000 |
| 9                | 1                | 1.328065         | 2.233541         | 0.000000 |
| 10               | 1                | -2.150176        | 0.914331         | 0.000000 |
| 11               | 1                | -1.359410        | -2.126712        | 0.000000 |

### Vibrational frequencies

|            |            |            |             |             |             |
|------------|------------|------------|-------------|-------------|-------------|
| 138.110592 | 521.57136  | 702.269088 | 941.393376  | 1601.781984 | 3142.420992 |
| 149.302944 | 566.809632 | 731.357952 | 1211.512896 | 2138.299872 | 3354.887328 |
| 269.079264 | 573.482976 | 860.3736   | 1258.245984 | 3003.757152 |             |
| 287.22624  | 605.277984 | 869.417856 | 1393.174464 | 3051.910656 |             |
| 432.117984 | 693.600576 | 884.89488  | 1577.946048 | 3138.411936 |             |

### Rotational constants (GHZ)

4.8557518 3.6795891 2.0933167

## btc

### Structure

| Center<br>Number | Atomic<br>Number | Coordinates<br>X | (Angstroms)<br>Y | Z        |
|------------------|------------------|------------------|------------------|----------|
| 1                | 6                | 0.234356         | 1.887916         | 0.000000 |
| 2                | 6                | 0.000000         | 0.558799         | 0.000000 |
| 3                | 6                | -1.377485        | 0.028226         | 0.000000 |
| 4                | 6                | -1.711050        | -1.248290        | 0.000000 |
| 5                | 6                | 1.083841         | -0.380028        | 0.000000 |
| 6                | 6                | 1.993731         | -1.176309        | 0.000000 |
| 7                | 1                | -0.585950        | 2.599936         | 0.000000 |
| 8                | 1                | 1.242942         | 2.285738         | 0.000000 |
| 9                | 1                | 2.796579         | -1.877984        | 0.000000 |
| 10               | 1                | -2.165125        | 0.791783         | 0.000000 |
| 11               | 1                | -2.628798        | -1.821356        | 0.000000 |

### Vibrational frequencies

|            |            |            |             |             |             |
|------------|------------|------------|-------------|-------------|-------------|
| 144.08784  | 508.599744 | 711.0072   | 953.29056   | 1609.599648 | 3141.146304 |
| 154.223712 | 564.853824 | 718.437408 | 1218.496512 | 2140.760352 | 3356.092608 |
| 268.140384 | 582.757728 | 816.171648 | 1267.511232 | 2937.699456 |             |
| 281.394624 | 602.384832 | 829.410624 | 1392.495648 | 3051.871296 |             |
| 443.015424 | 685.503648 | 880.574592 | 1580.809344 | 3139.537824 |             |

### Rotational constants (GHZ)

4.9153413 3.5561827 2.0633656

## C4Y-2

### Structure

| Center Number | Atomic Number | Coordinates X | (Angstroms) Y | Z         |
|---------------|---------------|---------------|---------------|-----------|
| 1             | 6             | -2.689893     | 0.003945      | -0.000216 |
| 2             | 6             | -1.468432     | -0.029891     | -0.000094 |
| 3             | 6             | -0.087346     | -0.047870     | 0.000231  |
| 4             | 6             | 0.934161      | -1.045303     | 0.000051  |
| 5             | 6             | 1.957666      | -0.124052     | -0.000125 |
| 6             | 6             | 0.989241      | 1.059799      | 0.000046  |
| 7             | 1             | 1.004001      | 1.696210      | 0.893216  |
| 8             | 1             | 1.003697      | 1.696133      | -0.893181 |
| 9             | 1             | 3.038851      | -0.191787     | -0.000258 |
| 10            | 1             | 0.896604      | -2.130113     | 0.000098  |
| 11            | 1             | -3.755529     | 0.029790      | 0.000768  |

### Vibrational frequencies

|            |            |             |             |             |             |
|------------|------------|-------------|-------------|-------------|-------------|
| 152.222496 | 513.58272  | 871.656192  | 1054.385472 | 1463.272992 | 3123.383328 |
| 174.403008 | 579.377472 | 919.7688    | 1166.018784 | 2006.539968 | 3350.247168 |
| 379.150176 | 584.299296 | 977.299968  | 1236.299136 | 2934.346944 |             |
| 382.37856  | 622.280736 | 1020.401088 | 1326.95184  | 2976.335424 |             |
| 485.294976 | 854.848608 | 1045.958688 | 1417.358976 | 3092.413824 |             |

### Rotational constants (GHZ)

13.02135 2.41911 2.06693

## C4

### Structure

| Center Number | Atomic Number | Atomic Type | Coordinates (Angstroms) |           |          |
|---------------|---------------|-------------|-------------------------|-----------|----------|
|               |               |             | X                       | Y         | Z        |
| 1             | 6             | 0           | -0.679531               | 1.889515  | 0.000000 |
| 2             | 6             | 0           | 0.000000                | 0.743576  | 0.000000 |
| 3             | 6             | 0           | -0.377392               | -0.731505 | 0.000000 |
| 4             | 6             | 0           | -1.496248               | -1.412798 | 0.000000 |
| 5             | 6             | 0           | 1.416103                | 0.312744  | 0.000000 |
| 6             | 6             | 0           | 1.095502                | -1.007462 | 0.000000 |
| 7             | 1             | 0           | 1.665822                | -1.929464 | 0.000000 |
| 8             | 1             | 0           | 2.353860                | 0.856917  | 0.000000 |
| 9             | 1             | 0           | -1.765085               | 1.897278  | 0.000000 |
| 10            | 1             | 0           | -0.172511               | 2.850388  | 0.000000 |
| 11            | 1             | 0           | -1.832696               | -2.439538 | 0.000000 |

### Vibrational frequencies

|            |            |            |             |             |             |
|------------|------------|------------|-------------|-------------|-------------|
| 210.024192 | 674.64432  | 815.971008 | 1041.592128 | 1638.400896 | 3128.047968 |
| 234.291744 | 680.815584 | 856.8432   | 1130.05968  | 1694.764512 | 3157.608384 |
| 286.19616  | 702.448896 | 886.008192 | 1246.88928  | 3044.495232 |             |
| 391.88592  | 730.724736 | 891.095808 | 1405.36176  | 3101.663136 |             |
| 608.676096 | 775.420704 | 965.513568 | 1494.883872 | 3123.728544 |             |

### Rotational constants (GHZ)

5.8273144 4.3461774 2.4894641

## FLV-2

### Structure

| Center Number | Atomic Number | Coordinates X | (Angstroms) Y | Z        |
|---------------|---------------|---------------|---------------|----------|
| 1             | 6             | 1.114091      | -0.194208     | 0.000000 |
| 2             | 6             | 0.585287      | -1.441303     | 0.000000 |
| 3             | 6             | -0.900453     | -1.361263     | 0.000000 |
| 4             | 6             | -1.204860     | -0.054915     | 0.000000 |
| 5             | 6             | 0.000000      | 0.783243      | 0.000000 |
| 6             | 6             | 0.079395      | 2.123422      | 0.000000 |
| 7             | 1             | -0.810760     | 2.745351      | 0.000000 |
| 8             | 1             | 2.162352      | 0.080103      | 0.000000 |
| 9             | 1             | 1.138093      | -2.375473     | 0.000000 |
| 10            | 1             | 1.039347      | 2.632668      | 0.000000 |
| 11            | 1             | -1.569789     | -2.212509     | 0.000000 |

### Vibrational frequencies

|            |            |             |             |             |             |
|------------|------------|-------------|-------------|-------------|-------------|
| 192.539712 | 696.725472 | 884.276256  | 1160.811168 | 1560.732576 | 3121.569312 |
| 324.588576 | 742.545984 | 919.215744  | 1230.230688 | 1647.451584 | 3126.9552   |
| 390.710688 | 745.717056 | 924.38064   | 1293.048096 | 3045.519264 |             |
| 603.2544   | 783.196032 | 945.479328  | 1404.81168  | 3086.432256 |             |
| 647.40672  | 876.56976  | 1068.046656 | 1474.668096 | 3113.0976   |             |

### Rotational constants (GHZ)

9.0349655 3.7485774 2.6493647

## b-C<sub>6</sub>H<sub>4</sub>.H

### Structure

| Center Number | Atomic Number | Coordinates X | (Angstroms) Y | Z         |
|---------------|---------------|---------------|---------------|-----------|
| 1             | 6             | -2.426386     | -0.741431     | 0.000112  |
| 2             | 6             | -1.344620     | -0.201699     | 0.000035  |
| 3             | 6             | -0.046887     | 0.411608      | -0.000058 |
| 4             | 6             | 0.103296      | 1.754014      | -0.000104 |
| 5             | 6             | 1.084389      | -0.471937     | -0.000070 |
| 6             | 6             | 2.022221      | -1.235241     | -0.000078 |
| 7             | 1             | -3.383833     | -1.210995     | 0.000181  |
| 8             | 1             | 1.090697      | 2.202657      | -0.000156 |
| 9             | 1             | -0.760072     | 2.410247      | -0.000078 |
| 10            | 1             | 3.848796      | 1.410812      | 0.001124  |
| 11            | 1             | 2.852335      | -1.904607     | -0.000088 |

### Vibrational frequencies

|            |            |            |             |             |             |
|------------|------------|------------|-------------|-------------|-------------|
| 6.48432    | 238.320576 | 567.12144  | 731.504736  | 1585.179168 | 3354.902112 |
| 47.65008   | 345.978048 | 605.112864 | 892.93632   | 2136.343776 | 3355.918464 |
| 101.673024 | 468.56928  | 607.41456  | 922.641984  | 2143.155936 |             |
| 132.32784  | 561.342528 | 658.4352   | 1235.880576 | 3059.918688 |             |
| 226.299456 | 561.479616 | 708.958752 | 1381.5768   | 3150.451392 |             |

### Rotational constants (GHZ)

5.97488 2.62981 1.82607

***i*-C<sub>4</sub>H<sub>3</sub>+C<sub>2</sub>H<sub>2</sub> : Transition states**

**TS(*i*-C<sub>4</sub>H<sub>3</sub>-C<sub>2</sub>H<sub>2</sub>→bct)**

Structure

| Center Number | Atomic Number | Coordinates X | (Angstroms) Y | Z         |
|---------------|---------------|---------------|---------------|-----------|
| 1             | 6             | -2.481298     | -0.767964     | -0.000024 |
| 2             | 6             | -1.488214     | -0.053340     | -0.000011 |
| 3             | 6             | -0.273502     | 0.575839      | 0.000008  |
| 4             | 6             | 0.260474      | 1.785266      | 0.000015  |
| 5             | 6             | 1.285330      | -1.071401     | 0.000053  |
| 6             | 6             | 2.451357      | -0.690195     | -0.000044 |
| 7             | 1             | -3.396480     | -1.314774     | -0.000037 |
| 8             | 1             | 1.338530      | 1.924911      | 0.000032  |
| 9             | 1             | -0.356902     | 2.684370      | 0.000004  |
| 10            | 1             | 0.524292      | -1.824673     | 0.000154  |
| 11            | 1             | 3.365678      | -0.139064     | -0.000142 |

Vibrational frequencies

|                   |            |            |             |             |             |
|-------------------|------------|------------|-------------|-------------|-------------|
| <i>i</i> 437.2488 | 281.612064 | 557.731872 | 866.8536    | 1843.837056 | 3348.61824  |
| 10.533504         | 376.661376 | 584.770848 | 868.906752  | 2010.9144   | 3350.682528 |
| 114.494496        | 461.986656 | 617.3304   | 998.435808  | 3003.130272 |             |
| 196.225824        | 498.632736 | 743.551776 | 1394.015328 | 3084.7464   |             |
| 221.68656         | 537.04752  | 793.081056 | 1675.50864  | 3259.397088 |             |

Rotational constants (GHZ)

5.9625935 2.3024884 1.6610607

**TS(bct→btt)**

Structure

| Center Number | Atomic Number | Coordinates X | (Angstroms) Y | Z         |
|---------------|---------------|---------------|---------------|-----------|
| 1             | 6             | 2.266955      | -0.769566     | -0.011300 |
| 2             | 6             | 1.209498      | -0.181370     | 0.026613  |
| 3             | 6             | -0.059803     | 0.473197      | 0.086183  |
| 4             | 6             | -1.246574     | -0.376234     | 0.487209  |
| 5             | 6             | -1.860974     | -1.196163     | -0.333546 |
| 6             | 6             | -0.199430     | 1.783470      | -0.177535 |
| 7             | 1             | 3.204421      | -1.276274     | -0.047253 |
| 8             | 1             | -1.172293     | 2.262765      | -0.125003 |
| 9             | 1             | 0.651902      | 2.399674      | -0.450152 |
| 10            | 1             | -1.581381     | -0.276557     | 1.522329  |
| 11            | 1             | -1.760683     | -1.509606     | -1.365666 |

Vibrational frequencies

|                     |            |            |             |             |             |
|---------------------|------------|------------|-------------|-------------|-------------|
| <i>i</i> 121.426176 | 517.65888  | 712.5936   | 934.79808   | 1610.469888 | 3131.945376 |
| 160.142784          | 556.670112 | 738.114048 | 1200.597984 | 2128.710336 | 3355.17024  |
| 219.040032          | 589.395744 | 840.43344  | 1221.670176 | 2998.900992 |             |
| 326.868384          | 607.209696 | 875.003232 | 1388.268576 | 3047.560608 |             |
| 333.46416           | 667.963968 | 897.864864 | 1596.486336 | 3128.960352 |             |

Rotational constants (GHZ)

5.5408127 3.0279959 2.1064009

### TS(bct→bcc)

#### Structure

| Center Number | Atomic Number | Coordinates X | (Angstroms) Y | Z         |
|---------------|---------------|---------------|---------------|-----------|
| 1             | 6             | 2.506079      | -0.538688     | -0.031022 |
| 2             | 6             | 1.368525      | -0.126045     | -0.009129 |
| 3             | 6             | 0.002440      | 0.304050      | 0.019176  |
| 4             | 6             | -1.023612     | -0.789015     | 0.061603  |
| 5             | 6             | -2.317999     | -0.649036     | -0.055905 |
| 6             | 6             | -0.311383     | 1.614344      | 0.013279  |
| 7             | 1             | 3.516511      | -0.878581     | -0.052203 |
| 8             | 1             | -1.348176     | 1.935158      | 0.045673  |
| 9             | 1             | 0.456227      | 2.379227      | -0.023299 |
| 10            | 1             | -0.594085     | -1.788944     | 0.202702  |
| 11            | 1             | -3.374772     | -0.540519     | -0.160888 |

#### Vibrational frequencies

|            |            |            |             |             |            |
|------------|------------|------------|-------------|-------------|------------|
| 692.56992  | 478.664544 | 604.102176 | 915.952224  | 1614.012672 | 3317.43504 |
| 25.57152   | 528.961728 | 699.388032 | 1185.607104 | 2131.8072   | 3354.68256 |
| 158.493408 | 534.028032 | 788.514624 | 1251.36288  | 2923.792128 |            |
| 265.9032   | 563.895552 | 797.283648 | 1387.622112 | 3053.196    |            |
| 283.229568 | 589.16592  | 886.578624 | 1571.318016 | 3140.876352 |            |

#### Rotational constants (GHZ)

8.0866147 2.4949014 1.9091658

### TS(bcc→bct)

#### Structure

| Center Number | Atomic Number | Coordinates X | (Angstroms) Y | Z         |
|---------------|---------------|---------------|---------------|-----------|
| 1             | 6             | 2.243425      | -0.897940     | -0.022524 |
| 2             | 6             | 1.221059      | -0.250771     | 0.011975  |
| 3             | 6             | -0.007754     | 0.478497      | 0.069177  |
| 4             | 6             | -1.246851     | -0.305672     | 0.417164  |
| 5             | 6             | -1.921453     | -1.053041     | -0.424932 |
| 6             | 6             | -0.056572     | 1.804340      | -0.141614 |
| 7             | 1             | 3.149467      | -1.458717     | -0.059820 |
| 8             | 1             | -0.997857     | 2.343158      | -0.091161 |
| 9             | 1             | 0.838253      | 2.373933      | -0.372380 |
| 10            | 1             | -1.575884     | -0.232705     | 1.462436  |
| 11            | 1             | -2.805100     | -1.678149     | -0.394547 |

#### Vibrational frequencies

|            |            |            |             |             |             |
|------------|------------|------------|-------------|-------------|-------------|
| 141.553056 | 512.646624 | 713.771232 | 947.73792   | 1625.67408  | 3133.296288 |
| 157.983072 | 555.634656 | 717.77232  | 1206.84     | 2130.179136 | 3355.1784   |
| 223.848096 | 589.948608 | 786.184416 | 1224.641568 | 2922.646656 |             |
| 321.30384  | 616.314528 | 852.516288 | 1390.361472 | 3048.940704 |             |
| 343.365888 | 638.622144 | 899.149728 | 1600.19712  | 3131.090784 |             |

#### Rotational constants (GHZ)

5.6212427 2.9655268 2.0516714

### TS(btt→btc)

#### Structure

| Center Number | Atomic Number | Coordinates X | (Angstroms) Y | Z        |
|---------------|---------------|---------------|---------------|----------|
| 1             | 6             | 0.247849      | 1.894536      | 0.000000 |
| 2             | 6             | 0.000000      | 0.568611      | 0.000000 |
| 3             | 6             | -1.395598     | 0.056448      | 0.000000 |
| 4             | 6             | -1.754427     | -1.201627     | 0.000000 |
| 5             | 6             | 1.069439      | -0.385148     | 0.000000 |
| 6             | 6             | 1.961657      | -1.201473     | 0.000000 |
| 7             | 1             | -0.566735     | 2.613328      | 0.000000 |
| 8             | 1             | 1.259760      | 2.284140      | 0.000000 |
| 9             | 1             | 2.754119      | -1.914861     | 0.000000 |
| 10            | 1             | -2.154072     | 0.851569      | 0.000000 |
| 11            | 1             | -2.066591     | -2.222270     | 0.000000 |

#### Vibrational frequencies

|           |          |          |           |           |           |
|-----------|----------|----------|-----------|-----------|-----------|
| i736.7267 | 464.0642 | 642.4238 | 967.0554  | 1667.3976 | 3458.5300 |
| 147.6121  | 557.6982 | 728.4116 | 1253.0956 | 2228.5753 | 3495.5795 |
| 151.0133  | 594.6115 | 764.6573 | 1313.7589 | 3028.5642 |           |
| 281.1135  | 616.8514 | 849.4231 | 1450.6596 | 3177.4607 |           |
| 298.2123  | 618.1456 | 919.0659 | 1650.2563 | 3268.3966 |           |

#### Rotational constants (GHZ)

4.84122 3.60916 2.06769

### TS(bcc→b-C<sub>6</sub>H<sub>4</sub>+H)

#### Structure

| Center Number | Atomic Number | Coordinates X | (Angstroms) Y | Z         |
|---------------|---------------|---------------|---------------|-----------|
| 1             | 6             | -2.229847     | -0.961511     | 0.000045  |
| 2             | 6             | -1.223166     | -0.292260     | 0.000011  |
| 3             | 6             | -0.019174     | 0.490064      | -0.000010 |
| 4             | 6             | -0.063744     | 1.838184      | -0.000070 |
| 5             | 6             | 1.206972      | -0.276372     | 0.000010  |
| 6             | 6             | 1.982971      | -1.218861     | -0.000071 |
| 7             | 1             | -3.120084     | -1.548584     | 0.000068  |
| 8             | 1             | 0.847419      | 2.425867      | -0.000084 |
| 9             | 1             | -1.015804     | 2.356973      | -0.000103 |
| 10            | 1             | 2.574675      | 1.207420      | 0.000748  |
| 11            | 1             | 2.789725      | -1.917146     | -0.000119 |

#### Vibrational frequencies

|             |            |            |             |             |             |
|-------------|------------|------------|-------------|-------------|-------------|
| i603.232608 | 349.442016 | 583.920576 | 733.374432  | 1591.349664 | 3344.887008 |
| 57.227616   | 454.914528 | 606.334368 | 903.874944  | 2046.656064 | 3354.532992 |
| 149.651616  | 521.508096 | 624.061344 | 913.311936  | 2140.390944 |             |
| 236.39184   | 561.889344 | 655.166976 | 1221.453504 | 3060.49488  |             |
| 303.215232  | 566.197824 | 711.427104 | 1377.70512  | 3152.081088 |             |

#### Rotational constants (GHZ)

5.4190307 3.0000750 1.9310244

### TS(btc→b-C<sub>6</sub>H<sub>4</sub>+H)

#### Structure

| Center Number | Atomic Number | Coordinates X | (Angstroms) Y | Z         |
|---------------|---------------|---------------|---------------|-----------|
| 1             | 6             | 0.161061      | 1.820648      | 0.040298  |
| 2             | 6             | 0.094733      | 0.471888      | -0.029570 |
| 3             | 6             | -1.159331     | -0.210255     | -0.145794 |
| 4             | 6             | -2.213793     | -0.806921     | -0.201473 |
| 5             | 6             | 1.274855      | -0.344414     | 0.004806  |
| 6             | 6             | 2.254643      | -1.051944     | 0.030754  |
| 7             | 1             | -0.739694     | 2.423836      | 0.013145  |
| 8             | 1             | 1.116290      | 2.326618      | 0.126848  |
| 9             | 1             | 3.122813      | -1.670773     | 0.055540  |
| 10            | 1             | -2.844663     | -1.030772     | 2.000179  |
| 11            | 1             | -3.127752     | -1.322919     | -0.389840 |

#### Vibrational frequencies

|             |            |            |             |             |             |
|-------------|------------|------------|-------------|-------------|-------------|
| i283.567584 | 250.737888 | 603.85488  | 732.72048   | 1577.352768 | 3353.049984 |
| 49.837248   | 356.219136 | 608.103168 | 890.98272   | 2107.994688 | 3354.547968 |
| 133.011552  | 469.0704   | 622.932096 | 923.437824  | 2141.821056 |             |
| 170.758848  | 561.976032 | 660.702912 | 1236.638208 | 3061.799904 |             |
| 238.787424  | 565.935648 | 703.578816 | 1380.319872 | 3152.556288 |             |

#### Rotational constants (GHZ)

5.7891106 2.6539866 1.8852626

### TS(bcc→C<sub>4</sub>Y-2)

#### Structure

| Center Number | Atomic Number | Coordinates X | (Angstroms) Y | Z         |
|---------------|---------------|---------------|---------------|-----------|
| 1             | 6             | 2.034393      | -0.361168     | -0.388989 |
| 2             | 6             | 0.984927      | -0.928058     | 0.231818  |
| 3             | 6             | -0.025868     | 0.109303      | 0.198885  |
| 4             | 6             | 0.682906      | 1.327172      | 0.081189  |
| 5             | 6             | -1.409787     | -0.062088     | 0.004437  |
| 6             | 6             | -2.604972     | -0.221042     | -0.146297 |
| 7             | 1             | 1.471269      | 1.557739      | 0.785866  |
| 8             | 1             | 0.257549      | 2.183573      | -0.443759 |
| 9             | 1             | 3.065263      | -0.639559     | -0.598747 |
| 10            | 1             | 0.889462      | -1.927245     | 0.654641  |
| 11            | 1             | -3.653143     | -0.359222     | -0.284258 |

#### Vibrational frequencies

|             |            |            |             |             |             |
|-------------|------------|------------|-------------|-------------|-------------|
| i661.823424 | 497.910624 | 717.522144 | 989.346816  | 1485.736032 | 3128.348064 |
| 156.227136  | 519.146688 | 810.412416 | 1123.143936 | 2075.79744  | 3352.306272 |
| 174.709632  | 594.293088 | 859.415616 | 1278.37008  | 3019.687104 |             |
| 387.366336  | 603.780384 | 876.059712 | 1323.928992 | 3037.408608 |             |
| 481.934016  | 658.270848 | 891.515424 | 1459.816896 | 3070.44192  |             |

#### Rotational constants (GHZ)

10.0467095 2.4887522 2.0758653

## TS(btc→C4)

### Structure

| Center<br>Number | Atomic<br>Number | Coordinates<br>X | (Angstroms)<br>Y | Z        |
|------------------|------------------|------------------|------------------|----------|
| 1                | 6                | -0.597313        | 1.883876         | 0.000000 |
| 2                | 6                | 0.000000         | 0.683678         | 0.000000 |
| 3                | 6                | 1.409733         | 0.285310         | 0.000000 |
| 4                | 6                | 1.369028         | -1.046627        | 0.000000 |
| 5                | 6                | -0.652551        | -0.634084        | 0.000000 |
| 6                | 6                | -1.607445        | -1.425574        | 0.000000 |
| 7                | 1                | -0.013389        | 2.799309         | 0.000000 |
| 8                | 1                | -1.677996        | 1.975905         | 0.000000 |
| 9                | 1                | -2.176397        | -2.329878        | 0.000000 |
| 10               | 1                | 2.271376         | 0.951373         | 0.000000 |
| 11               | 1                | 2.067695         | -1.876186        | 0.000000 |

### Vibrational frequencies

|             |            |            |             |             |            |
|-------------|------------|------------|-------------|-------------|------------|
| i624.734016 | 493.241856 | 714.093024 | 930.318336  | 1634.085504 | 3136.33392 |
| 188.469984  | 568.924896 | 754.03008  | 1148.696064 | 1895.177376 | 3318.49536 |
| 229.631712  | 591.163488 | 824.29824  | 1241.542944 | 3043.597344 |            |
| 269.511264  | 624.147744 | 855.03216  | 1398.94512  | 3052.509024 |            |
| 367.197024  | 689.9616   | 867.263136 | 1545.660288 | 3111.078144 |            |

### Rotational constants (GHZ)

5.0302662 4.3324290 2.3276707

## TS(btc→FLV-2)

### Structure

| Center<br>Number | Atomic<br>Number | Coordinates<br>X | (Angstroms)<br>Y | Z        |
|------------------|------------------|------------------|------------------|----------|
| 1                | 6                | -0.019445        | 2.086867         | 0.000000 |
| 2                | 6                | 0.000000         | 0.743842         | 0.000000 |
| 3                | 6                | 1.173247         | -0.101755        | 0.000000 |
| 4                | 6                | 1.372710         | -1.326566        | 0.000000 |
| 5                | 6                | -1.196169        | -0.133242        | 0.000000 |
| 6                | 6                | -1.000812        | -1.444238        | 0.000000 |
| 7                | 1                | -0.957662        | 2.633898         | 0.000000 |
| 8                | 1                | 0.896405         | 2.667960         | 0.000000 |
| 9                | 1                | 1.907793         | -2.252704        | 0.000000 |
| 10               | 1                | -2.187727        | 0.323065         | 0.000000 |
| 11               | 1                | -1.635995        | -2.321661        | 0.000000 |

### Vibrational frequencies

|             |            |            |             |             |             |
|-------------|------------|------------|-------------|-------------|-------------|
| i448.866912 | 523.647264 | 719.879616 | 936.647616  | 1635.949056 | 3135.6864   |
| 199.234272  | 589.550496 | 760.437984 | 1172.182272 | 1884.186048 | 3307.817184 |
| 299.73216   | 606.541152 | 840.24192  | 1232.83104  | 3012.73728  |             |
| 332.719392  | 691.101312 | 864.165024 | 1399.446048 | 3052.710912 |             |
| 505.344192  | 698.595936 | 888.043872 | 1563.236544 | 3123.970176 |             |

### Rotational constants (GHZ)

6.2770679 3.8616047 2.3908016



## Hydrogen shifts

### TS(FLV-1→FLV-2)

Structure

| Center Number | Atomic Number | Coordinates X | (Angstroms) Y | Z        |
|---------------|---------------|---------------|---------------|----------|
| 1             | 6             | -0.481021     | -1.445832     | 0.000000 |
| 2             | 6             | 0.983203      | -1.188697     | 0.000000 |
| 3             | 6             | 1.288616      | 0.147085      | 0.000000 |
| 4             | 6             | 0.000000      | 0.811072      | 0.000000 |
| 5             | 6             | -1.034836     | -0.210850     | 0.000000 |
| 6             | 6             | -0.819452     | 1.875756      | 0.000000 |
| 7             | 1             | -0.783352     | 2.964122      | 0.000000 |
| 8             | 1             | -1.884083     | 0.927994      | 0.000000 |
| 9             | 1             | -0.942336     | -2.424634     | 0.000000 |
| 10            | 1             | 1.716744      | -1.991428     | 0.000000 |
| 11            | 1             | 2.273965      | 0.592738      | 0.000000 |

Vibrational frequencies

|              |            |            |             |             |             |
|--------------|------------|------------|-------------|-------------|-------------|
| i2301.119424 | 680.774112 | 867.402528 | 1058.972064 | 1511.6832   | 3129.658176 |
| 78.384672    | 689.085216 | 893.022912 | 1146.507552 | 1577.773056 | 3135.537216 |
| 457.599744   | 717.299232 | 903.080736 | 1240.230816 | 1770.206112 |             |
| 469.225152   | 761.313984 | 930.677568 | 1298.2776   | 3062.530848 |             |
| 618.709824   | 788.964288 | 951.478848 | 1427.379744 | 3071.647104 |             |

Rotational constants (GHZ)

8.61816 4.11581 2.78552

### TS(C4Y-1→C4Y-2)

Structure

| Center Number | Atomic Number | Coordinates X | (Angstroms) Y | Z         |
|---------------|---------------|---------------|---------------|-----------|
| 1             | 6             | -2.671868     | -0.042943     | -0.118890 |
| 2             | 6             | -1.464369     | -0.017794     | 0.013580  |
| 3             | 6             | -0.074668     | -0.010055     | 0.208760  |
| 4             | 6             | 1.022665      | -1.022691     | 0.002106  |
| 5             | 6             | 1.958198      | -0.046549     | -0.187959 |
| 6             | 6             | 0.970284      | 1.032574      | -0.004274 |
| 7             | 1             | 0.858426      | 2.063402      | -0.320218 |
| 8             | 1             | 0.341526      | 0.777362      | 1.194272  |
| 9             | 1             | 3.039683      | -0.038152     | -0.245584 |
| 10            | 1             | 1.046927      | -2.095067     | 0.154262  |
| 11            | 1             | -3.728013     | -0.062796     | -0.262666 |

Vibrational frequencies

|              |            |             |             |             |          |
|--------------|------------|-------------|-------------|-------------|----------|
| i2009.295072 | 507.958272 | 742.693056  | 1071.380928 | 1470.197856 | 3132.48  |
| 173.871168   | 552.32928  | 785.185536  | 1157.422368 | 1782.397152 | 3353.744 |
| 186.929376   | 612.949728 | 900.427296  | 1217.495328 | 2084.79984  |          |
| 451.669248   | 619.844352 | 938.397984  | 1241.206176 | 3103.041504 |          |
| 485.227008   | 690.074208 | 1030.646304 | 1307.001312 | 3113.959488 |          |

Rotational constants (GHZ)

13.4654883 2.4135626 2.0943642

## ***Non interacting fragments***

### ***n*-C<sub>4</sub>H<sub>3</sub> (HCCH cis)**

Structure

| Center Number | Atomic Number | Coordinates X | (Angstroms) Y | Z |
|---------------|---------------|---------------|---------------|---|
| 1             | 6             | -0.366892     | 1.837239      | 0 |
| 2             | 6             | 0.000000      | 0.684294      | 0 |
| 3             | 6             | 0.491565      | -0.654865     | 0 |
| 4             | 6             | -0.258487     | -1.745096     | 0 |
| 5             | 1             | -0.712754     | 2.845806      | 0 |
| 6             | 1             | 1.584260      | -0.764289     | 0 |
| 7             | 1             | -0.068626     | -2.810945     | 0 |

Vibrational frequencies

|            |             |             |
|------------|-------------|-------------|
| 219.418848 | 655.618368  | 1587.461088 |
| 336.851904 | 783.442848  | 2136.807168 |
| 515.575968 | 791.53584   | 2927.133216 |
| 563.78112  | 987.587328  | 3135.62544  |
| 610.963776 | 1232.056896 | 3355.79472  |

Rotational constants (GHZ)

68.27530 4.79182 4.47757

### ***n*-C<sub>4</sub>H<sub>3</sub> (HCCH trans)**

Structure

| Center Number | Atomic Number | Coordinates X | (Angstroms) Y | Z |
|---------------|---------------|---------------|---------------|---|
| 1             | 6             | -0.508960     | 1.752290      | 0 |
| 2             | 6             | 0.000000      | 0.653920      | 0 |
| 3             | 6             | 0.622118      | -0.633177     | 0 |
| 4             | 6             | -0.054251     | -1.771344     | 0 |
| 5             | 1             | -0.972453     | 2.712548      | 0 |
| 6             | 1             | 1.714349      | -0.653322     | 0 |
| 7             | 1             | -1.095344     | -2.069363     | 0 |

Vibrational frequencies

|            |             |             |
|------------|-------------|-------------|
| 207.093408 | 675.605184  | 1572.720384 |
| 347.061984 | 838.873632  | 2127.573024 |
| 494.91264  | 850.152     | 3000.764832 |
| 557.890272 | 967.968096  | 3133.400544 |
| 603.970176 | 1234.965696 | 3355.365216 |

Rotational constants (GHZ)

50.36687 5.08031 4.61483

### ***i*-C<sub>4</sub>H<sub>3</sub>**

Structure

| Center | Atomic | Coordinates | (Angstroms) |
|--------|--------|-------------|-------------|
|--------|--------|-------------|-------------|

| Number | Number | X         | Y         | Z |
|--------|--------|-----------|-----------|---|
| 1      | 6      | 0.003969  | 1.874992  | 0 |
| 2      | 6      | 0.000000  | 0.565280  | 0 |
| 3      | 6      | -0.000166 | -0.756261 | 0 |
| 4      | 6      | -0.011747 | -1.993025 | 0 |
| 5      | 1      | -0.918898 | 2.458946  | 0 |
| 6      | 1      | 0.930607  | 2.453019  | 0 |
| 7      | 1      | 0.035954  | -3.057882 | 0 |

Vibrational frequencies

|            |             |             |
|------------|-------------|-------------|
| 48.036     | 601.67808   | 1743.710016 |
| 133.855392 | 846.552576  | 1952.67888  |
| 241.163232 | 874.016256  | 2971.860384 |
| 430.627296 | 957.14496   | 3027.860928 |
| 555.138048 | 1407.275712 | 3346.41024  |

Rotational constants (GHZ)

292.76519 4.14018 4.08245

## C<sub>2</sub>H<sub>2</sub>

### Structure

| Center<br>Number | Atomic<br>Number | Coordinates<br>X | (Angstroms)<br>Y | Z         |
|------------------|------------------|------------------|------------------|-----------|
| 1                | 6                | 0                | 0                | 0.602476  |
| 2                | 6                | 0                | 0                | -0.602476 |
| 3                | 1                | 0                | 0                | -1.669118 |
| 4                | 1                | 0                | 0                | 1.669118  |

### Vibrational frequencies

513.479904 3303.926592  
513.479904 3400.104768  
744.205632  
744.205632  
2004.712896

### Rotational constants (GHZ)

35.274675

## I-C<sub>6</sub>H<sub>4</sub> (cis)

### Structure

| Center<br>Number | Atomic<br>Number | Coordinates<br>X | (Angstroms)<br>Y | Z |
|------------------|------------------|------------------|------------------|---|
| 1                | 6                | -1.351008        | -2.064098        | 0 |
| 2                | 6                | -1.229882        | -0.858963        | 0 |
| 3                | 6                | -1.14797         | 0.5559           | 0 |
| 4                | 6                | 0                | 1.27537          | 0 |
| 5                | 6                | 1.309084         | 0.732422         | 0 |
| 6                | 6                | 2.44663          | 0.316434         | 0 |
| 7                | 1                | -1.431578        | -3.127319        | 0 |
| 8                | 1                | -2.091577        | 1.098426         | 0 |
| 9                | 1                | -0.076546        | 2.361144         | 0 |
| 10               | 1                | 3.438575         | -0.074644        | 0 |

### Vibrational frequencies

104.125152 544.188576 714.763776 1208.278368 3042.075456  
227.488896 568.360512 751.30992 1379.363808 3057.628704  
252.213216 593.398272 864.442368 1584.320544 3355.366944  
366.188544 601.94736 924.925056 2120.548608 3355.762368  
431.289696 606.012288 1006.830048 2138.452416

### Rotational constants (GHZ)

7.29418 2.46626 1.84309

### **b-C<sub>6</sub>H<sub>4</sub>**

#### Structure

| Center Number | Atomic Number | Coordinates X | (Angstroms) Y | Z |
|---------------|---------------|---------------|---------------|---|
| 1             | 6             | 0             | 1.800137      | 0 |
| 2             | 6             | 0             | 0.449318      | 0 |
| 3             | 6             | 1.222291      | -0.303351     | 0 |
| 4             | 6             | -1.222321     | -0.303313     | 0 |
| 5             | 6             | -2.238067     | -0.958893     | 0 |
| 6             | 6             | 2.238113      | -0.958809     | 0 |
| 7             | 1             | 0.930938      | 2.356378      | 0 |
| 8             | 1             | -0.93094      | 2.356373      | 0 |
| 9             | 1             | -3.137565     | -1.531573     | 0 |
| 10            | 1             | 3.137468      | -1.531715     | 0 |

#### Vibrational frequencies

|            |            |            |             |             |
|------------|------------|------------|-------------|-------------|
| 131.832768 | 561.185088 | 658.626912 | 1236.276768 | 3061.316256 |
| 225.57408  | 561.445824 | 707.799264 | 1382.383296 | 3151.462752 |
| 239.052576 | 566.816352 | 731.514912 | 1585.975392 | 3354.745152 |
| 345.22128  | 604.843392 | 890.988    | 2137.440864 | 3355.696704 |
| 468.718944 | 606.996576 | 922.999872 | 2143.979328 |             |

#### Rotational constants (GHZ)

6.20344 2.84460 1.95029

### **o-C<sub>6</sub>H<sub>4</sub>**

#### Structure

| Center Number | Atomic Number | Coordinates X | (Angstroms) Y | Z |
|---------------|---------------|---------------|---------------|---|
| 1             | 6             | -1.20607      | -0.684496     | 0 |
| 2             | 6             | -1.291023     | 0.697581      | 0 |
| 3             | 6             | 0             | 1.271037      | 0 |
| 4             | 6             | 1.17189       | 0.492174      | 0 |
| 5             | 6             | 1.143081      | -0.920202     | 0 |
| 6             | 6             | -0.164081     | -1.376989     | 0 |
| 7             | 1             | -2.195451     | 1.297429      | 0 |
| 8             | 1             | 0.08937       | 2.355309      | 0 |
| 9             | 1             | 2.136954      | 0.994438      | 0 |
| 10            | 1             | 2.046339      | -1.52181      | 0 |

#### Vibrational frequencies

|            |            |             |             |             |
|------------|------------|-------------|-------------|-------------|
| 379.548288 | 725.47872  | 968.39232   | 1276.663392 | 3050.74176  |
| 389.982336 | 810.18528  | 1043.816256 | 1381.315488 | 3065.79168  |
| 419.677536 | 836.457216 | 1072.36464  | 1428.172704 | 3086.549952 |
| 572.231808 | 877.798272 | 1126.045824 | 1442.779008 | 3090.45024  |
| 597.890208 | 924.131616 | 1234.916736 | 1945.324224 |             |

#### Rotational constants (GHZ)

7.01034 5.70136 3.14423

### **m-C<sub>6</sub>H<sub>4</sub>**

#### Structure

| Center Number | Atomic Number | Coordinates X | (Angstroms) Y | Z |
|---------------|---------------|---------------|---------------|---|
| 1             | 6             | -0.237596     | -1.32409      | 0 |
| 2             | 6             | -1.023915     | -0.187738     | 0 |
| 3             | 6             | -1.347249     | 1.122734      | 0 |
| 4             | 6             | 0             | 1.040956      | 0 |
| 5             | 6             | 1.259557      | 0.47249       | 0 |
| 6             | 6             | 1.12036       | -0.933628     | 0 |
| 7             | 1             | -2.183295     | 1.819224      | 0 |
| 8             | 1             | 2.198827      | 1.013147      | 0 |
| 9             | 1             | 1.957516      | -1.631249     | 0 |
| 10            | 1             | -0.599998     | -2.345472     | 0 |

#### Vibrational frequencies

|            |            |             |             |             |
|------------|------------|-------------|-------------|-------------|
| 304.770336 | 734.235264 | 941.905152  | 1262.248416 | 3050.190528 |
| 388.274112 | 773.996832 | 1040.455296 | 1349.606208 | 3055.88304  |
| 546.307968 | 784.816704 | 1043.643072 | 1378.23792  | 3100.234176 |
| 562.990848 | 796.281408 | 1051.186944 | 1520.815296 | 3104.41488  |
| 593.318784 | 877.2312   | 1125.890688 | 1780.89792  |             |

#### Rotational constants (GHZ)

8.74431 5.02713 3.19203

### **p-C<sub>6</sub>H<sub>4</sub>**

#### Structure

| Center Number | Atomic Number | Coordinates X | (Angstroms) Y | Z |
|---------------|---------------|---------------|---------------|---|
| 1             | 6             | -1.193477     | -0.739677     | 0 |
| 2             | 6             | 0             | -1.363524     | 0 |
| 3             | 6             | 1.193476      | -0.739678     | 0 |
| 4             | 6             | 1.193477      | 0.739679      | 0 |
| 5             | 6             | 0             | 1.363521      | 0 |
| 6             | 6             | -1.193477     | 0.739679      | 0 |
| 7             | 1             | 2.176944      | -1.196464     | 0 |
| 8             | 1             | 2.176945      | 1.196461      | 0 |
| 9             | 1             | -2.176944     | 1.196463      | 0 |
| 10            | 1             | -2.176943     | -1.196465     | 0 |

#### Vibrational frequencies

|          |          |           |           |           |
|----------|----------|-----------|-----------|-----------|
| 295.1794 | 708.0429 | 898.0662  | 1254.2500 | 3223.3673 |
| 456.6870 | 722.4179 | 958.0332  | 1331.8126 | 3227.5864 |
| 480.1184 | 740.2519 | 1090.1669 | 1423.6920 | 3242.3032 |
| 492.1130 | 835.0702 | 1110.1843 | 1489.3906 | 3243.3376 |
| 555.6788 | 857.2096 | 1180.0726 | 1716.4369 |           |

#### Rotational constants (GHZ)

6.59303 5.77740 3.07916

### Relative Gibbs free energies

| n-C <sub>4</sub> H <sub>3</sub> + C <sub>2</sub> H <sub>2</sub>                   | 300 K  | 600 K  | 900 K  | 1200 K  | 1500 K  | 1800 K  | 2100 K  |
|-----------------------------------------------------------------------------------|--------|--------|--------|---------|---------|---------|---------|
| n-C <sub>4</sub> H <sub>3</sub> ,C <sub>2</sub> H <sub>2</sub> (cis)              | 380.42 | 335.97 | 287.40 | 237.70  | 187.59  | 137.33  | 86.98   |
| n-C <sub>4</sub> H <sub>3</sub> ,C <sub>2</sub> H <sub>2</sub> (trans)            | 384.10 | 341.23 | 294.31 | 246.28  | 197.88  | 149.32  | 100.70  |
| lctt                                                                              | 246.39 | 231.90 | 215.33 | 198.20  | 180.87  | 163.46  | 146.00  |
| lctc                                                                              | 243.63 | 229.41 | 213.07 | 196.15  | 179.01  | 161.79  | 144.52  |
| lcct                                                                              | 256.16 | 241.41 | 224.57 | 207.16  | 189.54  | 171.84  | 154.10  |
| lccc                                                                              | 254.71 | 239.95 | 223.04 | 205.53  | 187.79  | 169.96  | 152.07  |
| C4Y-1                                                                             | 215.38 | 205.21 | 193.10 | 180.39  | 167.44  | 154.40  | 141.31  |
| FLV-1                                                                             | 118.82 | 114.84 | 109.90 | 104.64  | 99.25   | 93.81   | 88.34   |
| Phenyl                                                                            | 0.00   | 0.00   | 0.00   | 0.00    | 0.00    | 0.00    | 0.00    |
| l-C <sub>6</sub> H <sub>4</sub> ,H                                                | 355.20 | 319.48 | 279.36 | 237.74  | 195.46  | 152.84  | 110.01  |
| TS(n-C <sub>4</sub> H <sub>3</sub> ,C <sub>2</sub> H <sub>2</sub> (cis) → lctt)   | 412.61 | 385.00 | 354.70 | 324.12  | 293.77  | 263.75  | 234.08  |
| TS(n-C <sub>4</sub> H <sub>3</sub> ,C <sub>2</sub> H <sub>2</sub> (cis) → lcct)   | 419.10 | 393.27 | 364.76 | 335.98  | 307.42  | 279.20  | 251.32  |
| TS(n-C <sub>4</sub> H <sub>3</sub> ,C <sub>2</sub> H <sub>2</sub> (trans) → ltct) | 437.37 | 420.26 | 401.01 | 381.20  | 361.18  | 341.07  | 320.92  |
| TS(lctt → lctc)                                                                   | 261.84 | 248.06 | 233.01 | 218.11  | 203.59  | 189.47  | 175.72  |
| TS(lctt → lcct)                                                                   | 259.61 | 248.85 | 237.21 | 225.82  | 214.84  | 204.27  | 194.07  |
| TS(lctc → lccc)                                                                   | 260.95 | 249.93 | 237.96 | 226.20  | 214.84  | 203.89  | 193.29  |
| TS(lcct → lccc)                                                                   | 270.70 | 256.61 | 241.22 | 225.96  | 211.07  | 196.58  | 182.44  |
| TS(lctc → l-C <sub>6</sub> H <sub>4</sub> +H)                                     | 409.05 | 390.12 | 368.23 | 345.72  | 323.18  | 300.80  | 278.62  |
| TS(lccc → l-C <sub>6</sub> H <sub>4</sub> +H)                                     | 404.31 | 383.50 | 359.76 | 335.40  | 311.01  | 286.78  | 262.77  |
| TS(lccc → C4Y-1)                                                                  | 396.89 | 387.27 | 376.48 | 365.79  | 355.42  | 345.40  | 335.71  |
| TS(lccc → FLV-1)                                                                  | 269.39 | 260.66 | 250.95 | 241.40  | 232.23  | 223.44  | 215.00  |
| TS(lccc → phenyl)                                                                 | 281.95 | 274.89 | 267.06 | 259.48  | 252.30  | 245.51  | 239.08  |
| i-C <sub>4</sub> H <sub>3</sub> + C <sub>2</sub> H <sub>2</sub>                   |        |        |        |         |         |         |         |
| i-C <sub>4</sub> H <sub>3</sub> ,C <sub>2</sub> H <sub>2</sub>                    | 338.88 | 294.91 | 246.67 | 197.26  | 147.44  | 97.45   | 47.37   |
| bcc                                                                               | 254.17 | 236.83 | 217.06 | 196.62  | 175.94  | 155.16  | 134.32  |
| bct                                                                               | 255.51 | 239.71 | 221.55 | 202.76  | 183.75  | 164.65  | 145.50  |
| Btt                                                                               | 248.38 | 233.99 | 217.30 | 200.00  | 182.47  | 164.87  | 147.22  |
| Btc                                                                               | 248.80 | 234.37 | 217.58 | 200.15  | 182.49  | 164.74  | 146.93  |
| C4Y-2                                                                             | 177.95 | 168.06 | 156.52 | 144.50  | 132.30  | 120.00  | 107.66  |
| C4                                                                                | 247.39 | 239.51 | 230.10 | 220.20  | 210.12  | 199.96  | 189.74  |
| FLV-2                                                                             | 141.88 | 137.81 | 133.01 | 128.00  | 122.91  | 117.78  | 112.64  |
| b-C <sub>6</sub> H <sub>4</sub> ,H                                                | 376.74 | 356.66 | 333.45 | 309.58  | 285.66  | 261.90  | 238.36  |
| TS(i-C <sub>4</sub> H <sub>3</sub> +C <sub>2</sub> H <sub>2</sub> → bct)          | 387.25 | 360.00 | 330.13 | 300.02  | 270.14  | 240.60  | 211.41  |
| TS(bct → btt)                                                                     | 262.82 | 252.23 | 240.54 | 229.05  | 217.96  | 207.27  | 196.95  |
| TS(bct → bcc)                                                                     | 269.15 | 251.08 | 231.43 | 211.84  | 192.60  | 173.74  | 155.24  |
| TS(btt → btc)                                                                     | 263.68 | 249.72 | 234.23 | 218.82  | 203.77  | 189.10  | 174.79  |
| TS(bcc → btc)                                                                     | 263.18 | 252.39 | 240.43 | 228.64  | 217.22  | 206.21  | 195.56  |
| TS(bcc → b-C <sub>6</sub> H <sub>4</sub> + H)                                     | 410.74 | 390.65 | 367.45 | 343.57  | 319.66  | 295.90  | 272.36  |
| TS(btc → b-C <sub>6</sub> H <sub>4</sub> + H)                                     | 390.40 | 366.81 | 339.96 | 312.40  | 284.81  | 257.36  | 230.13  |
| TS(bcc → C4Y-2)                                                                   | 359.95 | 350.28 | 339.46 | 328.76  | 318.41  | 308.43  | 298.80  |
| TS(btc → C4)                                                                      | 326.82 | 316.89 | 305.75 | 294.72  | 284.03  | 273.72  | 263.76  |
| TS(btc → FLV-2)                                                                   | 306.13 | 298.81 | 290.60 | 282.57  | 274.93  | 267.69  | 260.80  |
| Hydrogen shifts                                                                   | 300.00 | 600.00 | 900.00 | 1200.00 | 1500.00 | 1800.00 | 2100.00 |
| TS(FLV-1 → FLV-2)                                                                 | 371.45 | 366.56 | 361.20 | 355.86  | 350.70  | 345.79  | 341.13  |
| TS(C4Y-1 → C4Y-2)                                                                 | 402.11 | 394.09 | 384.89 | 375.58  | 366.45  | 357.57  | 348.96  |
